# Supplementary material for: A natural compound hyperoside targetsSalmonellaTyphimurium T3SS needle protein InvG
Source: Royal Society of Chemistry journal article supplement (doi:10.1039/d2fo00908k), 2022-01-01
Supplement: d2fo00908k1.pdf [file d2fo00908k1.pdf]

Table S1 Compounds tested in this study

|                       |                                   |                   |                  |            |                 |                    |             |
|-----------------------|-----------------------------------|-------------------|------------------|------------|-----------------|--------------------|-------------|
| <b>Flavonoids</b>     | 7,8-Benzoflavone                  | Purerarin         | Apigenin         | Eupatorin  | Baicalin        | Ginkgetin          | Daidzin     |
|                       | Sophoricoside                     | Naringenin        | Kaempferol       | Cyanidin   | Purerarin       | Silydianin         | Acacetin    |
|                       | Licorice flavonoids               | Isoginkgetin      | Corylifolinin    | Liquiritin | Farrerol        | Loganin            | Oroxylin A  |
|                       | Wogonoside                        | Liquiritigenin    | Hesperidin       | Chrysin    | Galangin        | Scutellarin        | Diosmetin   |
|                       | Isoliquiritigenin                 | Breviscapine      | Epicatechin      | Vitexin    | Biochanin       | Quercetin          | Fraxetol    |
|                       | Amentoflavone                     | Pinocembrin       | Tectoridin       | Silibinin  | Orientin        | Icariin            | Fraxin      |
|                       | Cowherb seed flavonoid glycosides | Acteoside         | Morin            | Phloretin  | Naringin        | Rutin              | Chrysin     |
| <b>Phenols</b>        | (-)-Epigallocatechin Gallate      | Paeonol           | Raspberry ketone | Glabridin  | Phloridzin      | Resveratrol        | Gastrodin   |
| <b>Alkaloids</b>      | Sanguinarine Chloride             | Magnoflorine      | Chelerythrine    | Matrine    | Nuciferine      | Ligustrazine       | Coptisine   |
|                       | Bulleyaconitine A                 | Hanfangichin      | Ergonovine       | Peiminine  | Berberine       |                    |             |
| <b>Quinones</b>       | Emodin                            | Juglone           | Hypericin        | Emodin     |                 |                    |             |
| <b>Glycoside</b>      | Gentiopicroside                   | Daucosterol       | Sweroside        | Arbutin    | Mangiferin      | Salidroside        |             |
|                       | Isoliquiritoside                  | Amygdalin         |                  |            |                 |                    |             |
| <b>Phenolic acids</b> | Cinnamic acid                     | Asiatic acid      | Gallic acid      | Carvacrol  | Rosmarinic acid | Chlorogenic acid   | Resveratrol |
|                       | Chlorogenic acid                  | Oleanic acid      | Cichoric acid    | Paeonol    | Abietic acid    | Caffeic acid       |             |
|                       | Gambogic acid                     | Vanillic acid     | Thymol           |            |                 |                    |             |
| <b>Terpenoid</b>      | Isoalantolactone                  | Diosbulbin B      | Obacunone        | Taxol      | Betulin         | Artemisinin        | Oridonin    |
|                       | Cryptotanshinone                  | Gardenoside       | Asiatic acid     | Linalool   | Asiaticoside    | $\alpha$ -cyperone | Bakuchiol   |
|                       | Andrographolide                   | Tubeimoside       | Momordinlc       | Myrcene    | Swertimarin     | Costunolide        | Cantharidin |
|                       | Saikosaponins                     | $\alpha$ -Asarone | alantolactone    |            |                 |                    |             |
| <b>Amide</b>          | Piperine                          |                   |                  |            |                 |                    |             |
| <b>Coumarin</b>       | Imperatorin                       | Daphnetin         | Osthole          | Bergenin   |                 |                    |             |
