# Supplementary material for: A natural compound hyperoside targetsSalmonellaTyphimurium T3SS needle protein InvG
Source: Royal Society of Chemistry journal article supplement (doi:10.1039/d2fo00908k), 2022-01-01
Supplement: d2fo00908k2.pdf [file d2fo00908k2.pdf]

Table S2 Strain or Plasmids used in this study

| Strain or Plasmid | Relevant genotypes                                                                                                         | Sources                               |
|-------------------|----------------------------------------------------------------------------------------------------------------------------|---------------------------------------|
| <b>Strains</b>    |                                                                                                                            |                                       |
| SL1344            | <i>Wild-type serovar Typhimurium</i>                                                                                       | (Liu et al., 2015; Zhou et al., 1999) |
| JS749             | <i>att::pDX1::hilA-lacZ</i>                                                                                                | (Lin et al., 2008)                    |
| JS751             | <i>att::pDX1::sopB-lacZ</i>                                                                                                | (Lin et al., 2008)                    |
| JS752             | <i>att::pDX1::sicA-lacZ</i>                                                                                                | (Lin et al., 2008)                    |
| DL1103            | <i>sipA*3flag</i>                                                                                                          | This study                            |
| DL1104            | <i>sipB*3flag</i>                                                                                                          | This study                            |
| DL1113            | <i>WT::prgK-6p-1</i>                                                                                                       | This study                            |
| DL1114            | <i>WT::prgH-6p-1</i>                                                                                                       | This study                            |
| DL1116            | <i>WT::spaR-6p-1</i>                                                                                                       | This study                            |
| DL1117            | <i>WT::invG-6p-1</i>                                                                                                       | This study                            |
| DL1118            | <i>WT::spaS-6p-1</i>                                                                                                       | This study                            |
| DL1119            | <i>WT::prgJ-6p-1</i>                                                                                                       | This study                            |
| DL1115            | <i>WT::sipA-lactamase</i>                                                                                                  | This study                            |
| <b>Plasmids</b>   |                                                                                                                            |                                       |
| pSR47s            | <i>oriR6K, oriT RP4, Kan<sup>R</sup>, SacB</i>                                                                             | (Luo and Isberg, 2004)                |
| pKS               | Amp, Construct used for in-frame knock in 3*flag<br>Cm <sup>r</sup> ColEoriV RP4oriT, helper plasmid in triparental mating | This study                            |
| pRK600            |                                                                                                                            | Invitrogen                            |
| pKD3              | Construct used for in-frame deletion of <i>sipA</i> and <i>sipB</i>                                                        | Invitrogen                            |
| pCP20             | <i>bla cat cl857 PRflppSC101 oriTS</i>                                                                                     | Invitrogen                            |
| pKD46             | <i>blaPBADgam bet exopSC101 oriTS</i>                                                                                      | Invitrogen                            |
| pGEX-6p-1         | For expression GST-tagged protein <i>S. Typhimurium</i>                                                                    | Invitrogen                            |
| pDL1210           | <i>pGEX-6p-1:: prgK</i>                                                                                                    | This study                            |
| pDL1211           | <i>pGEX-6p-1:: prgH</i>                                                                                                    | This study                            |
| pDL1216           | <i>pGEX-6p-1::spaR</i>                                                                                                     | This study                            |
| pDL1217           | <i>pGEX-6p-1::invG</i>                                                                                                     | This study                            |
| pDL1218           | <i>pGEX-6p-1::spaS</i>                                                                                                     | This study                            |

## References

Liu, Y., Zhang, Q., Hu, M., Yu, K., Fu, J., Zhou, F., and Liu, X. (2015). Proteomic Analyses of Intracellular *Salmonella enterica* Serovar Typhimurium Reveal Extensive Bacterial Adaptations to Infected Host Epithelial Cells. *Infect Immun* 83, 2897-2906.

Luo, Z.Q., and Isberg, R.R. (2004). Multiple substrates of the *Legionella pneumophila* Dot/Icm system identified by interbacterial protein transfer. *Proc Natl Acad Sci U S A* 101, 841-846.

Zhou, D., Mooseker, M.S., and Galan, J.E. (1999). Role of the *S. typhimurium* actin-binding protein SipA in bacterial internalization. *Science* 283, 2092-2095.

D. Lin, C.V. Rao, J.M. Slauch, The *Salmonella* SPI1 type three secretion system responds to periplasmic disulfide bond status via the flagellar apparatus and the

RcsCDB system, *Journal of bacteriology* 190(1) (2008) 87-97.
