# Supplementary material for: A natural compound hyperoside targetsSalmonellaTyphimurium T3SS needle protein InvG
Source: Royal Society of Chemistry journal article supplement (doi:10.1039/d2fo00908k), 2022-01-01
Supplement: d2fo00908k3.pdf [file d2fo00908k3.pdf]

Table S3 Primers used in this study

| Primer name | Sequence (Restriction enzyme sites are underlined) | Note                               |
|-------------|----------------------------------------------------|------------------------------------|
| SL1101      | GTC <u>GAGCTCGTGGT</u> CACGTCAGAAAAGGGCA           | sipA up Sac I<br>Knock-in 3*flag   |
| SL1102      | TCCCCCGGGACGCTGCATGTGCAAGCCATCAACG                 | sipA up Sma I<br>Knock-in 3*flag   |
| SL1103      | CGCCTCGAGTAATTAACCGGGAAAGATGCGATGA                 | sipA down Sac I Knock-in<br>3*flag |
| SL1104      | CATGGTACCGTTCACCATTAATCACCATAA                     | sipA down Sma I Knock-in<br>3*flag |
| SL1105      | CTTGTCGACGTTCCACCATTAATCACCATAA                    | sipA down Sal I Knock-in<br>3*flag |
| SL1106      | GTCGAGCTCACCATTGTCAGCGTTGTGGC                      | sipB up Sac I<br>Knock-in 3*flag   |
| SL1107      | TCCCCCGGGTGCGCGACTCTGGCGCAGAATAAAA                 | sipB up Sma I<br>Knock-in 3*flag   |
| SL1108      | CGCCTCGAGTAAAAACTGCCAAAATAAAGGGAGA                 | sipB down Xho I Knock-in<br>3*flag |
| SL1109      | CATGGTACCCTTCATATTTAACGATTTTCAGAGAA                | sipB down Kpn I Knock-in<br>3*flag |
| SL1110      | CTTGTCGACCTTCATATTTAACGATTTTCAGAGAA                | sipB down Sal I Knock-in<br>3*flag |
| SL1122      | CGCGGATCCATTCGTCGATATCTATATACTTTTCTG<br>C          | prgK 5' BamH I                     |
| SL1123      | CCGGAATTCCTATTCATTTGACGATTTTCGCCTTA                | prgK 3' EcoR I                     |
| SL1124      | CGCGGATCCGCGATGTCGATTGCAACTATTGTCCC<br>TGA         | prgH 5' BamH I                     |
| SL1125      | CCGGAATTCGGTCATGAGCGTAATAGCGTTTCAA<br>CAG          | prgH 3' EcoR I                     |
| SL1140      | CGCGGATCCTTTTACGCGTTGTACTTTGAAATTCA                | spaR 5' BamH I                     |
| SL1141      | CCGGAATTCCTTATTCGAGGACATGCGTCGCC                   | spaR 3' EcoR I                     |
| SL1142      | CGCGGATCCTCCTCGAATAAAACAGAAAACCG                   | spaS 5' BamH I                     |
| SL1143      | CGCGGATCCTCAATGCCGTACCTCGTTTTCTTGTG                | spaS 3' EcoR I                     |
| SL1144      | CGCGGATCCAAGACACATATTCTTTTGGCCAGAG                 | invG 5' BamH I                     |
| SL1145      | CGCGGATCCTTTAATTGCCTCCTGACCTCTATC                  | invG 3' EcoR I                     |
| SL1146      | CGCGGATCCTCGATTGCAACTATTGTCCCTGA                   | prgJ 5' EcoR I                     |
| SL1147      | CTGGTCTGACTCATGAGCGTAATAGCGTTTCA                   | prgJ 3' Sal I                      |
| SL1148      | GTTGTAGGGAAAGCTTCGCCAGTAATGCGTTAGGA                | InvG(E/A) 5'                       |
| SL1149      | TCCTAACGCATTACTGGCGAAGCTTCCCTACAAC                 | InvG(E/A) 3'                       |
| SL1150      | CAAATCAGCCCCAGTTGTGCGGAAAGCTTCTCCA<br>GTAAT        | InvG(L/A) 5'                       |
| SL1151      | ATTACTGGAGAAGCTTTCGCGACAACCTGGGGCTGA<br>TTTGG      | InvG(L/A) 3'                       |
| SL1152      | GCCCATCGAAATACCAAGCCAGCCCCAGTTGTAG                 | InvG(I/A) 5'                       |

|        |                                       |              |
|--------|---------------------------------------|--------------|
|        | GG                                    |              |
| SL1153 | CCCTACAACCTGGGGCTGGCTTGGTATTTTCGATGGG | InvG(I/A) 3' |
|        | C                                     |              |
| SL1154 | GCCACGTAGCGGGTAAGCTTTGTTATATAAACCTG   | InvG(N/D) 5' |
|        | AGCGTTTTAGAA                          |              |
| SL1155 | TTCTAAAACGCTCAGGTTTATATAACAAAGCTTACC  | InvG(N/D) 3' |
|        | CGCTACGTGGC                           |              |

---
